# Supplementary material
Source: PubMed Central journal article supplement (PMC8173466)
Supplement: jamasurg-e212058-s001.pdf [file jamasurg-e212058-s001.pdf]

## Supplemental Online Content

Burd RS, Jensen AR, VanBuren JM, et al; Eunice Kennedy Shriver National Institute of Child Health and Human Development Collaborative Pediatric Critical Care Research Network Assessment of Health-Related Quality of Life and Functional Outcomes after Pediatric Trauma Investigators. Factors associated with functional impairment after pediatric injury. *JAMA Surg*. Published online June 2, 2021.  
doi:10.1001/jamasurg.2021.2058

**eAppendix 1.** Preexisting Chronic Conditions Assessed at Enrollment

**eAppendix 2.** New Domain-Related Morbidity Determined by Multivariable Logistic Regression, Children with Isolated Head-Not Severe Used as Reference Injury Category

This supplemental material has been provided by the authors to give readers additional information about their work.

**eAppendix 1. Preexisting Chronic Conditions Assessed at Enrollment**

Asthma  
Autoimmune disease  
Cancer  
Cardiovascular disease - acquired  
Cardiovascular disease - arrhythmia  
Cardiovascular disease - congenital  
Chronic liver disease  
Chronic renal failure  
Chronic lung disease  
Congenital anomaly or chromosomal defect  
Diabetes  
Immunological disorders  
Metabolic disease  
Musculoskeletal  
Neurologic - static encephalopathy  
Neurologic - other chronic condition  
Neurologic - chronic seizures  
Rheumatology disorder  
Transplant  
Other

**eAppendix 2. New Domain-Related Morbidity Determined by Multivariable Logistic Regression, Children with Isolated Head-Not Severe Used as Reference Injury Category**

| Parameter                                                         | Odds Ratio (95% CI)  |       |
|-------------------------------------------------------------------|----------------------|-------|
| Intercept                                                         | 0.01 (0.00, 0.01)    | <.001 |
| Age (reference - 10-14 years)                                     |                      |       |
| <1 year                                                           | 4.32 (2.37, 7.88)    | <.001 |
| 1-4 years                                                         | 2.79 (1.88, 4.15)    | <.001 |
| 5-9 years                                                         | 0.93 (0.64, 1.36)    | 0.71  |
| Initial systolic blood pressure (reference - normal) <sup>1</sup> | 0.76 (0.18, 3.19)    | 0.70  |
| Initial heart rate (reference - normal) <sup>1</sup>              | 1.24 (0.81, 1.90)    | 0.32  |
| Penetrating injury (reference - blunt)                            | 0.64 (0.15, 2.67)    | 0.53  |
| Child physical abuse (reference - no abuse)                       | 0.58 (0.34, 0.98)    | 0.04  |
| Race (reference - White)                                          |                      |       |
| Black                                                             | 1.78 (1.26, 2.51)    | 0.001 |
| Other                                                             | 1.84 (1.24, 2.72)    | 0.002 |
| Ethnicity (reference - not Hispanic or Latino)                    | 0.52 (0.31, 0.89)    | 0.02  |
| Insurance (reference - private/commercial)                        |                      |       |
| Medicaid/Medicare                                                 | 0.40 (0.30, 0.54)    | <.001 |
| More than one                                                     | 0.38 (0.17, 0.88)    | 0.02  |
| No insurance                                                      | 0.70 (0.26, 1.89)    | 0.48  |
| Other                                                             | 0.43 (0.21, 0.88)    | 0.020 |
| Injury category (AIS≥3) (reference - isolated head [not severe])  |                      |       |
| Isolated head (severe)                                            | 54.57 (26.68, 111.6) | <.001 |
| Isolated thoracic                                                 | 22.75 (9.87, 52.46)  | <.001 |
| Isolated abdominal                                                | 5.40 (2.11, 13.84)   | <.001 |
| Isolated spinal                                                   | 86.95 (36.84, 205.2) | <.001 |
| Isolated extremity                                                | 26.22 (13.93, 49.35) | <.001 |
| Multiple, including head (severe)                                 | 1503 (598.2, 3775)   | <.001 |
| Multiple, including head (not severe)                             | 100.5 (38.05, 265.4) | <.001 |
| Multiple, excluding head                                          | 55.82 (24.83, 125.5) | <.001 |

1-normal=z-score 1.96 to 1.96, not normal=z-score < -1.96 or > 1.96
